# Supplementary material
Source: Springer Nature journal article supplement (https://www.springermedizin.de/resource/supplementary/13041_2013_234_MOESM2_ESM.pdf/25657796)

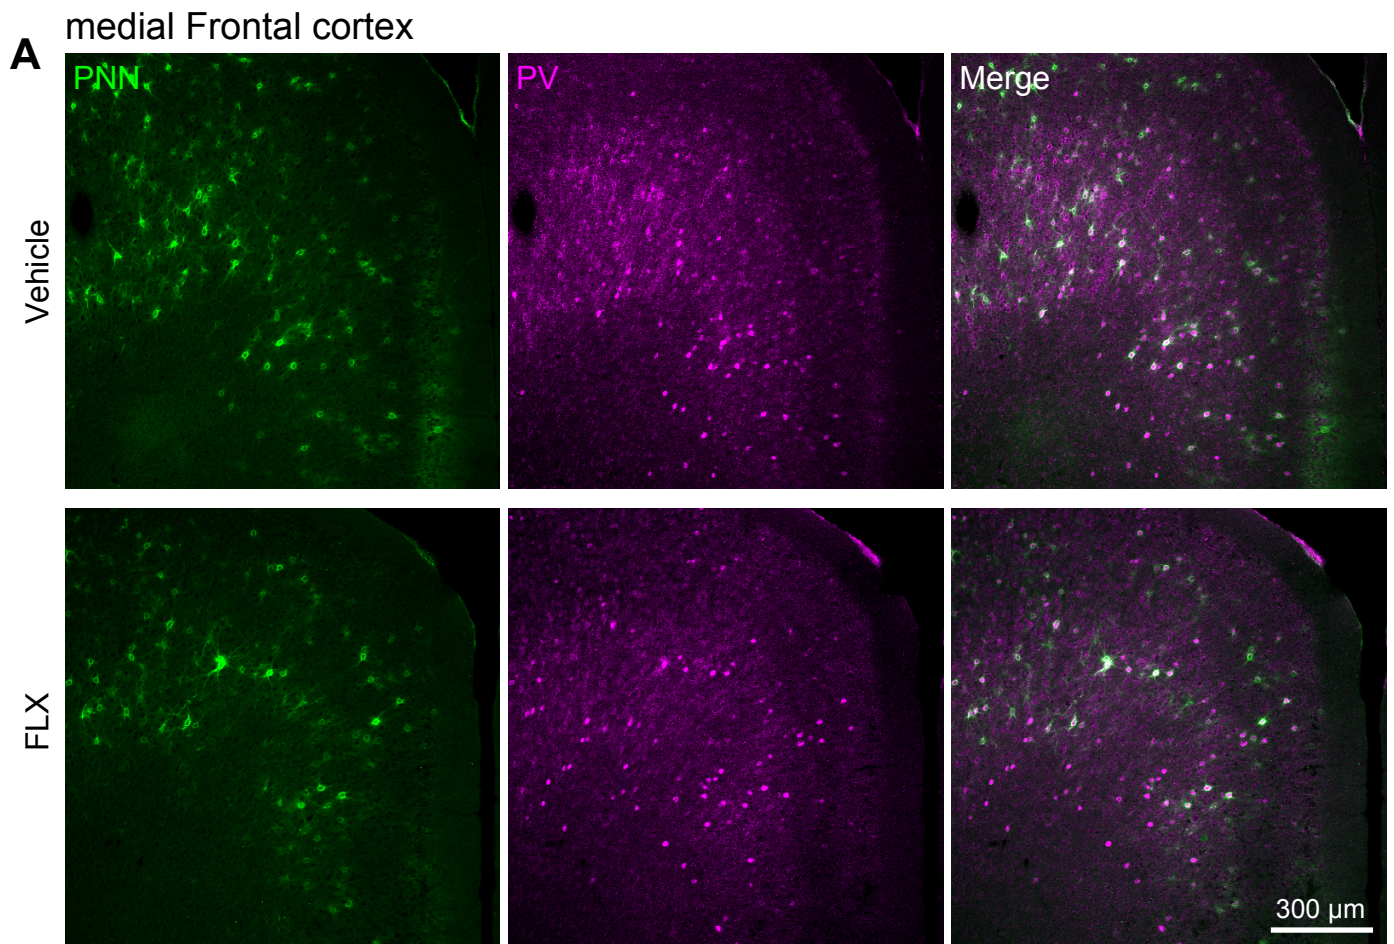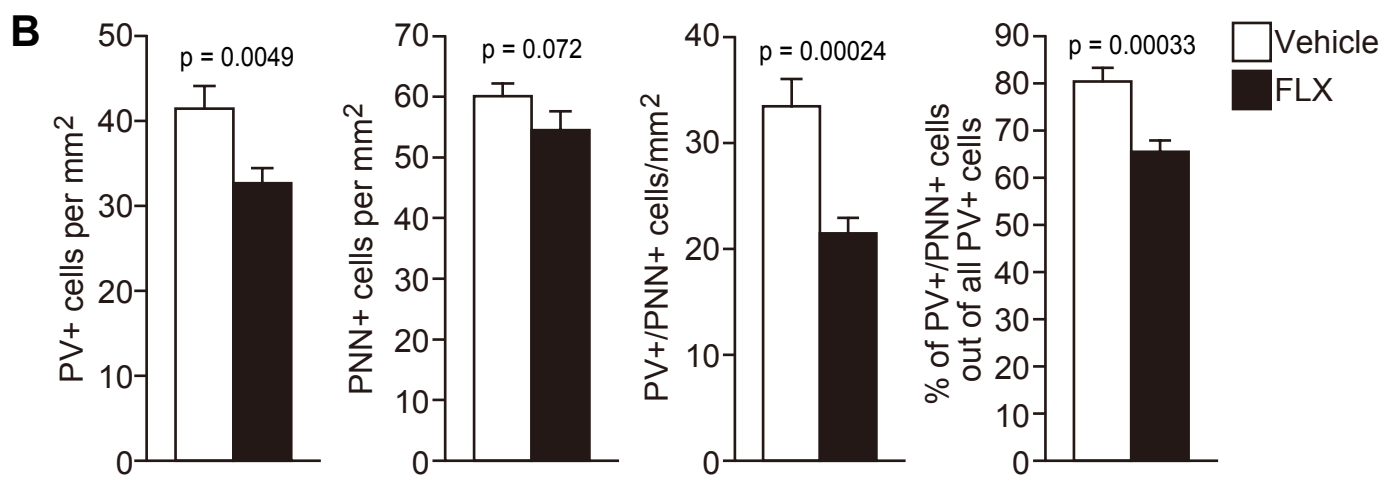

Figure 1

Supplement: MOESM2 [file 25657796]
